# Supplementary material
Source: publisher site journal article supplement (https://www.dovepress.com/article/362443)
Supplement: Supplementary file 1 [file get_supplementary_file.php]

**Supplementary information**

**The single factor experiment on the formula of RJ-III@HACC-SLNs**

*Preparation of RJ-III@HACC-SLNs：* 20 mg egg yolk lecithin and 3 mg RJ-III were completely dissolved in absolute alcohol and thereafter mixed with glycerol monostearate (30 mg) to form an oil phase. Vacuum rotary evaporation was used to remove the organic solvent to obtain a lipid film layer. Under sustained ultrasound, 10 mL water phase supplemented with 0.2 % (w/v) Tween-80 was added to the lipid film in 30 min using a needle. The RJ-III@SLNs were obtained after intermittent sonication by a probe sonicator (Xinzhi, Ningbo, China) at 400 w for 4 min (2s / 3s). Finally, 4 mL RJ-III@SLNs was added to 8 mL HACC solution (0.1%, w / v), followed by further stirring for 1 h to obtain RJ-III@HACC-SLNs.

*Optimization of the* *amount of lipid to drug ratio：*The amount of lipid to drug ratio of HACC@RJ-III-SLNs was screened from three proportions (20:1, 15:1,10:1) by single-factor experiment based on particle size, Zeta potential, and EE. As shown in Figure S1, when the lipid/drug ratio gradually decreased from 20:1 to 10:1, the particle size of HACC@RJ-III-SLNs did not change markedly, which may be because RJ-III is a small molecule compound with certain water solubility, so the influence of lipid/drug ratio on particle size was comparatively small. With the increase of RJ-III, the potential of the HACC@RJ-III-SLNs steadily increased, and the EE gradually decreased, which may be due to the limited lipid prescription for the encapsulation of RJ-III, and the constant increase of drug dosage of RJ-III led to the system overload.

**Figure S1**. The influences of different lipid-drug ratios on HACC@RJ-III-SLNs particle size, potential (A), and encapsulation efficiency (B) (Mean ± SD, n = 3)

*Optimization* *of the mass ratio of* *cosurfactant (CoS) to surfactant (S)：*The effects of the mass ratio of cosurfactant to surfactant (2:1, 1:1, 1:2) on the particle size, Zeta potential, and EE of HACC@RJ-III-SLNs were investigated under the condition of lipid/drug = 15:1 and the lipid content in the prescription was 60%. As shown in Figure S2, the particle size of HACC@RJ-III-SLNs gradually decreased, while the potential and EE steadily increased when the CoS to S mass ratio was improved. This result may indicate that egg yolk lecithin, as a cosurfactant, can not only form a mixed surfactant with Tween-80 to maintain system stability, but can also generate a mixed lipid with glycerol monostearate, enhancing RJ-III solubility in lipids and therefore boosting EE.

**Figure S2.** The influences of different ratios of surfactant to surfactant on HACC@RJ-III-SLNs particle size, potential (A), and encapsulation efficiency (B) (Mean ± SD, n = 3)

*Optimization of the* *water volume：*The effects of the water volume (5, 10, 20 mL) on the particle size, Zeta potential, and EE of HACC@RJ-III-SLNs were investigated under the condition of lipid / drug = 15:1 and CoS / S = 1:2. The results showed that the particle size and EE of RJ-III@HACC-SLNs were shown to be inversely proportional to the water phase volume, with the smaller particle size and EE being associated with the larger water phase volume (Figure S3). Therefore, in this study, the water phase volume was determined to be 10 mL when RJ-III was fixed into 3 mg.

**Figure S3.** The influences of different water volumes on HACC@RJ-III-SLNs particle size, potential (A), and encapsulation efficiency (B) (Mean ± SD, n = 3)
